# Supplementary material
Source: PubMed Central journal article supplement (PMC2698407)
Supplement: supp_191_12_3832__1.pdf [file supp_191_12_3832__1.pdf]

**Table 1.** Oligonucleotides used in this study.

| Oligonucleotide | Sequence (5'-3') (length [nt]) <sup>a</sup>                                                                                                  |
|-----------------|----------------------------------------------------------------------------------------------------------------------------------------------|
| 1               | ggcgat <b>ggatcc</b> gcgGTAA <u>ACTCAAAA</u> ACTCACAGGAGTAATTGAGTAGACTGTAACAGCTATATTTAAGTATGAAAGTGA<br>TCccac <b>gaattc</b> gccc (98)        |
| 2               | ggcg <b>gaattc</b> gtggGATC <u>ACTTT</u> CATACTTAAATATAGCTGTTACAGTCT <u>ACTCA</u> ATTACTCCTGTGAGTTTTTGAGTTTAC<br>C <b>gcatcc</b> atcgcc (98) |
| 3               | ggcgat <b>ggatcc</b> gcgGTAATGTAACAGCTATACAGGAGT <b>a</b> ATTGAGTAGACACACAATTGAGTATTTAAGTATGAAAGTGA<br>Cccac <b>gaattc</b> gccc (98)         |
| 4               | ggcg <b>gaattc</b> gtggGATC <u>ACTTT</u> CATACTTAAATACTCAATTGTGTGTCTACTCAAT <b>t</b> ACTCCTGTATAGCTGTTACATTACC<br>g <b>catcc</b> atcgcc (98) |
| 5               | ggcgat <b>ggatcc</b> gcgGTAA <u>ACTCAAAA</u> ACTCACAGGAGTAATTGAGTAGACACACAATTGAGTATTTTGTAACAGCTATGA<br>TCccac <b>gaattc</b> gccc (98)        |
| 6               | ggcg <b>gaattc</b> gtggGATCATAGCTGTTACAAAATACTCAATTGTGTGTCTACTCAATTACTCCTGTGAGTTTTTGAGTTTAC<br>C <b>gcatcc</b> atcgcc (98)                   |
| 7               | CATACAAAGAGTATGGTAA <u>ACTCAAAA</u> ACTCACAACTAATCTAGCGTAGACACACAATTGAGTATTTAAGTATGAA<br><u>AGT</u> GATCTCATTCTGAATCCG (98)                  |
| 8               | CGGATTCAGAAATGAGATC <u>ACTTT</u> CATACTTAAATACTCAATTGTGTGTCTACGCTAGATTAGTTGTGAGTTTTTGAG<br><u>TTT</u> ACCATACTCTTTGTATG (98)                 |
| 9               | GCTAAGCTTGCATGCCTG (18)                                                                                                                      |
| 10              | ACGAATTCGTGGCATCACCG (20)                                                                                                                    |
| 11              | CCAGTGCCAAGCTTGCATG (19)                                                                                                                     |
| 12              | AACAGCTATGACCATGATTA (20)                                                                                                                    |
| 13              | CATACAAAGAGTATGGTAA (19)                                                                                                                     |
| 14              | CGGATTCAGAAATGAGATC (19)                                                                                                                     |
| 15              | GCACCCAGGCTTTACACTTTATGCTTC (28)                                                                                                             |
| 16              | CGCCAGGTTTTCCAGTCACGAC (24)                                                                                                                  |
| 17              | CTGTGGCGCCGGTGATGC (18)                                                                                                                      |
| 18              | GGCCAGACAGGCGGTAAGGGC (21)                                                                                                                   |
| 19              | ggcgat <b>ggatcc</b> gcgGTAA <u>ACTCAAAA</u> ACTCACAGccac <b>gaattc</b> gccc (50)                                                            |
| 20              | ggcg <b>gaattc</b> gtggCTGTGAGTTTTTGAGTTTACCg <b>catcc</b> atcgcc (50)                                                                       |
| 21              | ggcgat <b>ggatcc</b> gcgACAGGAGTAATTGAGTAGACccac <b>gaattc</b> gccc (50)                                                                     |

|    |                                                                                 |
|----|---------------------------------------------------------------------------------|
| 22 | gggcggaattcgtggGTCTACTCAATTACTCCTGTcgcggatccatcgcc (50)                         |
| 23 | ggcgatggatccgcgAGACACACAATTGAGTATTTccacgaattccgccc (50)                         |
| 24 | gggcggaattcgtggAAATACTCAATTGTGTGTCTcgcggatccatcgcc (50)                         |
| 25 | ggcgatggatccgcgATTTAAGTATGAAAGTGATCccacgaattccgccc (50)                         |
| 26 | gggcggaattcgtggGATCACTTTCATACTTAAATcgcggatccatcgcc (50)                         |
| 27 | ggcgatggatccgcgAGACACACAATTGAGTATTTAAGTATGAAAGTGATCcggtgatccacgaattccgccc (74)  |
| 28 | gggcggaattcgtggcatcaccgGATCACTTTCATACTTAAATACTCAATTGTGTgtctcgcggatccatcgcc (74) |
| 29 | ggcgatggatccgcgAGACACACAATTACTCATTccacgaattccgccc (50)                          |
| 30 | gggcggaattcgtggAAATGAGTAATTGTGTGTCTcgcggatccatcgcc (50)                         |
| 31 | AGTATGGTAAACTCAAAACTCACAAactaatcTaGctactataACgA (48)                            |
| 32 | TcGTtataggtagCtAgattagtTGTGAGTTTTTTGAGTTTACCATACT (48)                          |
| 33 | AGTATGGTAAACTCAAAACTCACAGGAGTAATTGAGTAGACACACAA (48)                            |
| 34 | TTGTGTGTCTACTCAATTACTCCTGTGAGTTTTTTGAGTTTACCATACT (48)                          |
| 35 | Cgccatggatcccccagtcacgacgttgtaaacgccacgaattccgccc (50)                          |
| 36 | Gggcgggaattcgtggcggtttacaacgtcgtgactgggggatccatggcg (50)                        |
| 37 | TCGTTATAGGTAGCTAGATTAGTTGTGAGTTTTTTGAGTTgACCATACT (48)                          |
| 38 | AGTATGGTcAACTCAAAACTCACAACTAATCTAGCTACCTATAACGA (48)                            |
| 39 | TCGTTATAGGTAGCTAGATTAGTTGTGAGTTTTTTGAGTgTACCATACT (48)                          |
| 40 | AGTATGGTAcACTCAAAACTCACAACTAATCTAGCTACCTATAACGA (48)                            |
| 41 | TCGTTATAGGTAGCTAGATTAGTTGTGAGTTTTTTGAGgTTACCATACT (48)                          |
| 42 | AGTATGGTAAcCTCAAAACTCACAACTAATCTAGCTACCTATAACGA (48)                            |
| 43 | TCGTTATAGGTAGCTAGATTAGTTGTGAGTTTTTTGAiTTTACCATACT (48)                          |
| 44 | AGTATGGTAAAaTCAAAACTCACAACTAATCTAGCTACCTATAACGA (48)                            |
| 45 | TCGTTATAGGTAGCTAGATTAGTTGTGAGTTTTTTGcGTTTACCATACT (48)                          |
| 46 | AGTATGGTAAAcgCAAAACTCACAACTAATCTAGCTACCTATAACGA (48)                            |
| 47 | TCGTTATAGGTAGCTAGATTAGTTGTGAGTTTTTTtAGTTTACCATACT (48)                          |

|    |                                                                                  |
|----|----------------------------------------------------------------------------------|
| 48 | AGTATGGTAA <u>ACT</u> aAAAACTCACA <u>ACT</u> AATCTAGCTACCTATAACGA (48)           |
| 49 | TCGTTATAGGTAGCTAGATTAGTTGT <u>GAG</u> TTTTgGAGTTTACCATACT (48)                   |
| 50 | AGTATGGTAA <u>ACT</u> CcAAAACTCACA <u>ACT</u> AATCTAGCTACCTATAACGA (48)          |
| 51 | TCGTTATAGGTAGCTAGATTAGTTGT <u>GAG</u> TTTgTGAGTTTACCATACT (48)                   |
| 52 | AGTATGGTAA <u>ACT</u> CAcAAAACTCACA <u>ACT</u> AATCTAGCTACCTATAACGA (48)         |
| 53 | TCGTTATAGGTAGCTAGATTAGTTGT <u>GAG</u> TTgTTGAGTTTACCATACT (48)                   |
| 54 | AGTATGGTAA <u>ACT</u> CAAcAACTCACA <u>ACT</u> AATCTAGCTACCTATAACGA (48)          |
| 55 | TCGTTATAGGTAGCTAGATTAGTTGT <u>GAG</u> TgTTTGAGTTTACCATACT (48)                   |
| 56 | AGTATGGTAA <u>ACT</u> CAAAcACTCACA <u>ACT</u> AATCTAGCTACCTATAACGA (48)          |
| 57 | TCGTTATAGGTAGCTAGATTAGTTGT <u>GAG</u> gTTTTGAGTTTACCATACT (48)                   |
| 58 | AGTATGGTAA <u>ACT</u> CAAAAcCTCACA <u>ACT</u> AATCTAGCTACCTATAACGA (48)          |
| 59 | TCGTTATAGGTAGCTAGATTAGTTGT <u>G</u> AtTTTTTGAGTTTACCATACT (48)                   |
| 60 | AGTATGGTAA <u>ACT</u> CAAAAAaTCACA <u>ACT</u> AATCTAGCTACCTATAACGA (48)          |
| 61 | TCGTTATAGGTAGCTAGATTAGTTGT <u>G</u> cTTTTTGAGTTTACCATACT (48)                    |
| 62 | AGTATGGTAA <u>ACT</u> CAAAAACgCACA <u>ACT</u> AATCTAGCTACCTATAACGA (48)          |
| 63 | TCGTTATAGGTAGCTAGATTAGTTGT <u>A</u> GTTTTTGAGTTTACCATACT (48)                    |
| 64 | AGTATGGTAA <u>ACT</u> CAAAA <u>ACT</u> aACA <u>ACT</u> AATCTAGCTACCTATAACGA (48) |
| 65 | TTGTGTGTCT <u>ACT</u> CAATTACTCCTGT <u>GAG</u> TTTTTGAGTTgACCATACT (48)          |
| 66 | AGTATGGTcAACTCAAAA <u>ACT</u> CACAGGAGTAATTGAGTAGACACACAA (48)                   |
| 67 | TTGTGTGTCT <u>ACT</u> CAATTACTCCTGT <u>GAG</u> TTTTTGAGTgTACCATACT (48)          |
| 68 | AGTATGGTAcACTCAAAA <u>ACT</u> CACAGGAGTAATTGAGTAGACACACAA (48)                   |
| 69 | TTGTGTGTCT <u>ACT</u> CAATTACTCCTGT <u>GAG</u> TTTTTGAGgTTACCATACT (48)          |
| 70 | AGTATGGTAAcCTCAAAA <u>ACT</u> CACAGGAGTAATTGAGTAGACACACAA (48)                   |
| 71 | TTGTGTGTCT <u>ACT</u> CAATTACTCCTGT <u>GAG</u> TTTTGAtTTTACCATACT (48)           |
| 72 | AGTATGGTAAAaTCAAAA <u>ACT</u> CACAGGAGTAATTGAGTAGACACACAA (48)                   |

|    |                                                                          |
|----|--------------------------------------------------------------------------|
| 73 | TTGTGTGTCT <u>ACTCAATTACTCCTGTGAGTTTTT</u> GcGTTTACCATACT (48)           |
| 74 | AGTATGGTAAACgCAAAA <u>ACTCACAGGAGTAATTGAGTAGACACACAA</u> (48)            |
| 75 | TTGTGTGTCT <u>ACTCAATTACTCCTGTGAGTTTTt</u> AGTTTACCATACT (48)            |
| 76 | AGTATGGTAA <u>ACTa</u> AAAA <u>ACTCACAGGAGTAATTGAGTAGACACACAA</u> (48)   |
| 77 | TTGTGTGTCT <u>ACTCAATTACTCCTGTGAGTTTTg</u> GAGTTTACCATACT (48)           |
| 78 | AGTATGGTAA <u>ACTCc</u> AAAA <u>ACTCACAGGAGTAATTGAGTAGACACACAA</u> (48)  |
| 79 | TTGTGTGTCT <u>ACTCAATTACTCCTGTGAGTTTg</u> TGAGTTTACCATACT (48)           |
| 80 | AGTATGGTAA <u>ACTCAc</u> AAAA <u>ACTCACAGGAGTAATTGAGTAGACACACAA</u> (48) |
| 81 | TTGTGTGTCT <u>ACTCAATTACTCCTGTGAGTTg</u> TTGAGTTTACCATACT (48)           |
| 82 | AGTATGGTAA <u>ACTCAAc</u> AA <u>ACTCACAGGAGTAATTGAGTAGACACACAA</u> (48)  |
| 83 | TTGTGTGTCT <u>ACTCAATTACTCCTGTGAGTg</u> TTTGAGTTTACCATACT (48)           |
| 84 | AGTATGGTAA <u>ACTCAAAc</u> ACTCACAGGAGTAATTGAGTAGACACACAA (48)           |
| 85 | TTGTGTGTCT <u>ACTCAATTACTCCTGTGAGg</u> TTTTGAGTTTACCATACT (48)           |
| 86 | AGTATGGTAA <u>ACTCAAAAc</u> CTCACAGGAGTAATTGAGTAGACACACAA (48)           |
| 87 | TTGTGTGTCT <u>ACTCAATTACTCCTGTGAi</u> TTTTGAGTTTACCATACT (48)            |
| 88 | AGTATGGTAA <u>ACTCAAAAAa</u> TCACAGGAGTAATTGAGTAGACACACAA (48)           |
| 89 | TTGTGTGTCT <u>ACTCAATTACTCCTGTGc</u> GTTTTT <u>GAGTTTACCATACT</u> (48)   |
| 90 | AGTATGGTAA <u>ACTCAAAAAc</u> gCACAGGAGTAATTGAGTAGACACACAA (48)           |
| 91 | TTGTGTGTCT <u>ACTCAATTACTCCTGTt</u> AGTTTTT <u>GAGTTTACCATACT</u> (48)   |
| 92 | AGTATGGTAA <u>ACTCAAAAAc</u> TaACAGGAGTAATTGAGTAGACACACAA (48)           |
| 93 | TTGTGTGTaT <u>ACTCAATTACTCCTGTGAGTTTTT</u> GAGTgACCATACT (48)            |
| 94 | AGTATGGTcAA <u>ACTCAAAAAc</u> ACTCACAGGAGTAATTGAGTAtACACACAA (48)        |
| 95 | TTGTGTGTCg <u>ACTCAATTACTCCTGTGAGTTTTT</u> GAGTgTACCATACT (48)           |
| 96 | AGTATGGTAc <u>ACTCAAAAAc</u> ACTCACAGGAGTAATTGAGTcGACACACAA (48)         |

|     |                                                                          |
|-----|--------------------------------------------------------------------------|
| 97  | TTGTGTGTCT <u>c</u> CTCAATTACTCCTGTGAGTTTTTGAGgTTACCATACT (48)           |
| 98  | AGTATGGTAA <u>c</u> CTCAAAA <u>A</u> CTCACAGGAGTAATTGAGgAGACACACAA (48)  |
| 99  | TTGTGTGTCT <u>Aa</u> TCAATTACTCCTGTGAGTTTTTGAtTTTACCATACT (48)           |
| 100 | AGTATGGTAA <u>Aa</u> TCAAAA <u>A</u> CTCACAGGAGTAATTGAtTAGACACACAA (48)  |
| 101 | TTGTGTGTCT <u>ACg</u> CAATTACTCCTGTGAGTTTTTGcGTTTACCATACT (48)           |
| 102 | AGTATGGTAA <u>Ac</u> GCAAAA <u>A</u> CTCACAGGAGTAATTGcGTAGACACACAA (48)  |
| 103 | TTGTGTGTCT <u>ACTa</u> AATTACTCCTGTGAGTTTTTtAGTTTACCATACT (48)           |
| 104 | AGTATGGTAA <u>ACTa</u> AAAA <u>A</u> CTCACAGGAGTAATTtAGTAGACACACAA (48)  |
| 105 | TTGTGTGTCT <u>ACTCc</u> ATTACTCCTGTGAGTTTTgGAGTTTACCATACT (48)           |
| 106 | AGTATGGTAA <u>ACTCc</u> AAAA <u>A</u> CTCACAGGAGTAATgGAGTAGACACACAA (48) |
| 107 | TTGTGTGTCT <u>ACTCAc</u> TTACTCCTGTGAGTTTgTGAGTTTACCATACT (48)           |
| 108 | AGTATGGTAA <u>ACTCAc</u> AA <u>A</u> CTCACAGGAGTAAgTGAGTAGACACACAA (48)  |
| 109 | TTGTGTGTCT <u>ACTCAAg</u> TACTCCTGTGAGTTgTTGAGTTTACCATACT (48)           |
| 110 | AGTATGGTAA <u>ACTCAAc</u> AA <u>A</u> CTCACAGGAGTAcTTGAGTAGACACACAA (48) |
| 111 | TTGTGTGTCT <u>ACTCAATg</u> ACTCCTGTGAGTgTTTGAGTTTACCATACT (48)           |
| 112 | AGTATGGTAA <u>ACTCAAAc</u> ACTCACAGGAGTcATTGAGTAGACACACAA (48)           |
| 113 | TTGTGTGTCT <u>ACTCAATTc</u> CTCCTGTGAGgTTTTGAGTTTACCATACT (48)           |
| 114 | AGTATGGTAA <u>ACTCAAAAc</u> CTCACAGGAGgAATTGAGTAGACACACAA (48)           |
| 115 | TTGTGTGTCT <u>ACTCAATTAa</u> TCCTGTGAtTTTTTGAGTTTACCATACT (48)           |
| 116 | AGTATGGTAA <u>ACTCAAAAAa</u> TCACAGGAtTAATTGAGTAGACACACAA (48)           |
| 117 | TTGTGTGTCT <u>ACTCAATTACg</u> CCTGTGcGTTTTTGAGTTTACCATACT (48)           |
| 118 | AGTATGGTAA <u>ACTCAAAAACg</u> CACAGGcGTAATTGAGTAGACACACAA (48)           |
| 119 | TTGTGTGTCT <u>ACTCAATTACTa</u> CTGTtAGTTTTTGAGTTTACCATACT (48)           |
| 120 | AGTATGGTAA <u>ACTCAAAAACTa</u> ACAGtAGTAATTGAGTAGACACACAA (48)           |

|     |                                                                                                                           |
|-----|---------------------------------------------------------------------------------------------------------------------------|
| 121 | <b>gatcc</b> atattaacctttactatacaaaagagtatGGTAA <i>tgT</i> <u><i>aAc</i></u> <i>Agctat</i> ACAGGAGTAATTGAGTAGAC (72)      |
| 122 | <i>atagcTgTtAca</i> TTACCatactctttgatgagtaaaggttaatatgg (48)                                                              |
| 123 | <u>ACACAATTGAGTATTTAAGTATGAAAGT</u> GATCtcatttctgaatccgaaagg (52)                                                         |
| 124 | <b>gatcc</b> ctttcggattcagaaatgaGATCACTTTCATACTTAAATACTCAATTGIGTGTCTACTCAATTACTCCTGT (76)                                 |
| 125 | <b>gatcc</b> atattaacctttactatacaaaagagtatGGTAA <u>ACTCAAAA</u> ACTCACAGGAGTAATTGAGTAGAC (72)                             |
| 126 | <u>GAGTTTTT</u> GAGTTTACCatactctttgatgagtaaaggttaatatgg (48)                                                              |
| 127 | <i>tgtaA</i> <u><i>cagctaT</i></u> ATTTAAGTATGAAAGT <u>GATC</u> tcatttctgaatccgaaagg (52)                                 |
| 128 | <b>gatcc</b> ctttcggattcagaaatgaGATCACTTTCATACTTAAAT <u><i>AtagctgT</i></u> <u><i>taca</i></u> GTCTACTCAATTACTCCTGT (76)  |
| 129 | <u>ACACAATTGAGTATTT</u> <i>tgtaATGgcta</i> TGATCtcatttctgaatccgaaagg (52)                                                 |
| 130 | <b>gatcc</b> ctttcggattcagaaatgaGATCA <u><i>atagcCAT</i></u> <u><i>taca</i></u> AAATACTCAATTGIGTGTCTACTCAATTACTCCTGT (76) |

<sup>a</sup>Nucleotides derived from O<sub>F</sub> are in upper case, and other nucleotides are in lower case. Restriction enzyme recognition sites or sticky ends are in bold, and subsites A-D are underlined. Nucleotides in bold and underlined in oligonucleotides 29/30 highlight the inverted half-site in subsite C. Mutations in oligonucleotides 121-130 are italicized.
